# Supplementary material
Source: MDPI journal article supplement (https://www.mdpi.com/2076-3263/13/10/301)
Supplement: s1 [file s1]

## Supplementary materials

# Geomorphology, Geoarchaeology and Geochronology of the Upper Pleistocene archaeological site of El Olivo Cave (Llanera, Asturias, Northern Spain)

Jesús F. Jordá Pardo <sup>1,3,\*</sup>, David Álvarez-Alonso <sup>2,3</sup>, María de Andrés-Herrero <sup>2,3</sup>, Daniel Ballesteros <sup>4</sup>, Pilar Carral <sup>5</sup>, Aitor Hevia-Carrillo <sup>6</sup>, Jorge Sanjurjo <sup>7</sup>, Santiago Giralt <sup>8</sup> and Montserrat Jiménez-Sánchez <sup>9</sup>

<sup>1</sup> Departamento de Prehistoria y Arqueología, Facultad de Geografía e Historia, UNED, Paseo Senda del Rey 7, E-28040 Madrid, Spain; jjorda@geo.uned.es

<sup>2</sup> Departamento de Prehistoria, Historia Antigua y Arqueología, Universidad Complutense de Madrid, C. Profesor Aranguren s/n, Ciudad Universitaria, E-28040 Madrid, Spain; david.alvarez@ucm.es; maria.deandres@ucm.es

<sup>3</sup> Grupo de Investigación en Arqueología Prehistórica - GIAP, Universidad Complutense de Madrid

<sup>4</sup> Departamento de Geodinámica, Universidad de Granada, Campus de Fuentenueva s/n, E-18071, Granada; dballesteros@ugr.es

<sup>5</sup> Departamento de Geología y Geoquímica, UAM, Campus de Cantoblanco, E-28049 Madrid, Spain; pilar.carral@uam.es

<sup>6</sup> Investigador en formación de la EID-UNED. Departamento de Prehistoria y Arqueología, Facultad de Geografía e Historia, UNED, Paseo Senda del Rey 7, E-28040 Madrid, Spain; aitorhevia@gmail.com

<sup>7</sup> University Institute of Geology Isidro Parga Pondal, University of A Coruña Campus de Elviña s/n, E-15011, A Coruña, Spain. jorge.sanjurjo.sanchez@udc.es

<sup>8</sup> Geoscience Barcelona Institut (CSIC), C. Lluís Solé i Sabarís s/n, E-08028 Barcelona, Spain; sgiralt@ictja.csic.es

<sup>9</sup> Grupo Geomorfología y Cuaternario, Departamento de Geología, Universidad de Oviedo, C. Jesús Arias de Velasco s/n, E-33005 Oviedo, Spain; mjimenez@uniovi.es

\* Correspondence: e-mail@e-mail.com; Tel.: (optional; include country code; if there are multiple corresponding authors, add author initials)





**Table S2. Granulometry.**

|                      | Gravel | Sand  | Silt  | Clay  |
|----------------------|--------|-------|-------|-------|
| OL 2a                | 23,82  | 45,53 | 21,00 | 9,64  |
| OL 2b                | 9,04   | 49,65 | 29,36 | 11,95 |
| OL 3                 | 3,76   | 50,16 | 31,55 | 14,53 |
| OL 4                 | 0,00   | 48,26 | 42,99 | 8,75  |
| OL 4 gravas          | 12,20  | 64,49 | 15,49 | 7,79  |
| OL 5                 | 59,68  | 26,96 | 7,59  | 5,76  |
| OL 6 arcillas        | 1,10   | 50,79 | 31,57 | 16,54 |
| OL 6                 | 0,00   | 57,83 | 35,47 | 6,70  |
| OL 7A                | 57,46  | 34,52 | 6,00  | 1,77  |
| OL 7Ox               | 49,90  | 39,91 | 7,48  | 2,68  |
| OL 7B                | 67,59  | 22,19 | 7,21  | 3,00  |
|                      |        |       |       |       |
|                      | Gravel | Sand  | Silt  | Clay  |
| OL Exterior 1        | 7,13   | 39,85 | 47,22 | 5,80  |
| OL Exterior 2        | 76,05  | 17,25 | 4,22  | 2,47  |
| OL Exterior 3        | 0,00   | 59,75 | 37,79 | 2,46  |
|                      |        |       |       |       |
| OL Arenas Exteriores | 0,00   | 82,79 | 15,87 | 1,34  |
| OL Arenas Anteriores | 1,96   | 67,19 | 20,50 | 10,35 |



Table S3. Mineralogy (DRX).

|                      | Quartz | Phyllosilicat | Calcite | Goethite |
|----------------------|--------|---------------|---------|----------|
| OL 7B                | 86     | 8             | 1       | 5        |
| OL 7Mn               | 82     | 10            |         | 8        |
| OL 7A                | 92     | 5             |         | 3        |
| OL 6                 | 88     | 11            |         | 1        |
| OL 6. Arcillas       | 70     | 26            | 1       | 3        |
| OL 5                 | 84     | 8             |         | 8        |
| OL 4. Gravas         | 89     | 8             |         | 3        |
| OL 4                 | 87     | 11            | 1       | 1        |
| OL 3                 | 87     | 10            | 1       | 3        |
| OL 2B                | 89     | 7             | 3       | 1        |
| OL 2A                | 82     | 11            | 4       | 3        |
|                      |        |               |         |          |
| OL exterior 3        | 93     | 7             |         |          |
| OL exterior 2        | 84     | 10            | 3       | 3        |
| OL exterior 1        | 81     | 15            |         | 4        |
|                      |        |               |         |          |
| OL arenas anteriores | 93     | 7             |         |          |
| OL arenas exteriores | 92     | 8             |         |          |

Table S4. CO<sub>3</sub>Ca, OC, OM.

|                       | % OM  | % OC    | % Ca C03 |
|-----------------------|-------|---------|----------|
| OL.7b                 | 0,06  | 0,0348  | 0,8      |
| OL.7b Ox              | 0,33  | 0,1914  | 0        |
| OL.7a                 | 0,401 | 0,23258 | 0,4      |
| OL.6                  | 0,267 | 0,15486 | 0,08     |
| Ol.6 Arcillas         | 0,2   | 0,116   | 2,68     |
| OL.5                  | 0,066 | 0,03828 | 0        |
| OL.4 gravas           | 0,066 | 0,03828 | 0,16     |
| OL.4                  | 3,47  | 2,0126  | 0,8      |
| Ol.3                  | 0,2   | 0,116   | 0,2      |
| OL.2b                 | 0,066 | 0,03828 | 4,2      |
| OL.2a                 | 0,066 | 0,03828 | 2,04     |
|                       |       |         |          |
| OL.Exterior 3         | 0,066 | 0,03828 | 0        |
| OL.Exterior 2         | 0,133 | 0,07714 | 4,92     |
| OL.Exterior 1         | 6,69  | 3,8802  | 0        |
|                       |       |         |          |
| OL. Arenas anteriores | 0,066 | 0,03828 | 0,08     |
| OL. Arenas exteriores | 0,066 | 0,03828 | 0        |

Table S5. pH.

|                       | pH in H2O |
|-----------------------|-----------|
| OL.7b                 | 8,16      |
| OL.7 Ox               | 7,6       |
| OL.7a                 | 8,17      |
| OL.6                  | 8,05      |
| Ol.6 Arcillas         | 8,02      |
| OL.5                  | 7,83      |
| OL.4 gravas           | 8,05      |
| OL.4                  | 8,1       |
| Ol.3                  | 7,86      |
| OL.2b                 | 7,92      |
| OL.2a                 | 8,02      |
|                       |           |
| OL.Exterior 3         | 7,1       |
| OL.Exterior 2         | 8,03      |
| OL.Exterior 1         | 6,91      |
|                       |           |
| OL. Arenas anteriores | 8,25      |
| OL. Arenas exteriores | 8,2       |

Table S6. Colour.

| El Olivo. Munsell Color |           |                                                                                   |           |                                                                                   |
|-------------------------|-----------|-----------------------------------------------------------------------------------|-----------|-----------------------------------------------------------------------------------|
| Samples                 | Dry color |                                                                                   | Wet color |                                                                                   |
| OL.2a                   | 7,5YR5/6  |  | 7,5YR4/6  |  |
| OL.2b                   | 10YR6/8   |  | 10YR5/8   |  |
| OL.3                    | 5YR5/8    |  | 5YR5/6    |  |
| OL.4                    | 7,5YR6/6  |  | 7,5YR5/6  |  |
| OL.4 gravas             | 7,5YR5/8  |  | 7,5YR5/6  |  |
| OL.5                    | 7,5YR 4/4 |  | 7,5YR 4/6 |  |
| OL.6                    | 7,5YR 6/8 |  | 7,5YR 5/8 |  |
| OL.7a                   | 7,5YR6/6  |  | 7,5YR5/8  |  |
| OL.7 Ox                 | 10YR3/4   |  | 10YR3/3   |  |
| OL.7b                   | 10YR5/8   |  | 10YR4/6   |  |
|                         |           |                                                                                   |           |                                                                                   |
| OL.Exterior 1           | 10YR2/2   |  | 10YR2/2   |  |
| OL.Exterior 2           | 10YR5/8   |  | 10YR4/6   |  |
| OL.Exterior 3           | 10YR6/6   |  | 10YR5/6   |  |
|                         |           |                                                                                   |           |                                                                                   |
| OL. Arenas anteriores   | 7,5YR5/8  |  | 7,5YR5/6  |  |
| OL. Arenas exteriores   | 7,5YR7/4  |  | 7,5YR5/6  |  |
